# Supplementary material for: Optimization of exogenous CeO2 nanoparticles on Pak choi (Brassica rapa L. var. chinensis) to alleviate arsenic stress
Source: Front Plant Sci. 2025 Jan 17;15:1497926. doi: 10.3389/fpls.2024.1497926 (PMC11782265; doi:10.3389/fpls.2024.1497926)
Supplement: Supplementary file 1 [file Table1.xlsx]

## Sheet: Growth Parameters
Root Length (cm)																								Shoot Length (cm)																								Root Fresh Weight (g)
Treatments			R1	R2	R3	Mean	St. Dev.	Increase from control			Root Length (cm)													Treatments			R1	R2	R3	Mean	St. Dev.	Increase from control			Shoot Length (cm)													Treatments
NPs	CK		3.64	3.711	2.86	3.40367	0.472166				NPs 0	NPs 75	NPs 150	NPs 300										NPs	CK		8.54	7.24	6.84	7.54	0.888819				NPs 0	NPs 75	NPs 150	NPs 300										NPs	CK
	75 mg		6.21	6.55	5.72	6.16	0.417253	80.9813	80.98	NPs	3.40367	6.16	5.56333	4.54											75 mg		14.48	12.62	13.01	13.37	0.980867	77.321		NPs	7.54	13.37	12.0267	9.43667											75 mg
	150 mg		4.91	5.74	6.04	5.56333	0.585349	63.4512	63.45																150 mg		10.8	12.34	12.94	12.0267	1.10387	59.5049																	150 mg
	300 mg		5.04	4.74	3.84	4.54	0.6245	33.3856	33.38																300 mg		9.6	8.67	10.04	9.43667	0.699452	25.1547																	300 mg

## Sheet: Chlorophyll Contents
Chl a																								Chl b																								Total Chl
Treatments			R1	R2	R3	Mean	St. Dev.	Increase from control			Chl a													Treatments			R1	R2	R3	Mean	St. Dev.	Increase from control			Chl b													Treatments
NPs	CK		0.201	0.164	0.181	0.182	0.0185203				NPs 0	NPs 75	NPs 150	NPs 300										NPs	CK		0.121	0.11	0.134	0.121667	0.0120139				NPs 0	NPs 75	NPs 150	NPs 300										NPs	CK
	75 mg		0.31	0.283	0.322	0.305	0.019975	67.5824		NPs	0.182	0.305	0.269333	0.235733											75 mg		0.2067	0.196	0.223	0.208567	0.0135964	71.4247		NPs	0.121667	0.208567	0.187333	0.154367											75 mg
	150 mg		0.291	0.251	0.266	0.269333	0.0202073	47.9853																	150 mg		0.181	0.178	0.203	0.187333	0.0136504	53.9726																	150 mg
	300 mg		0.213	0.2452	0.249	0.235733	0.0197791	29.5238																	300 mg		0.1621	0.147	0.154	0.154367	0.00755667	26.8767																	300 mg

## Sheet: IRGA
(E) Transpiration Rate (mol m-2 s-1)																								(A) Photosynthetic Rate (µmol m-2 s-1)																								(gsw) Stomata Conductance (mol m-2 s-1)
Treatments			R1	R2	R3	R4	Mean	St. Dev.	Increase from control		(E) Transpiration Rate (mol m-2 s-1)													Treatments			R1	R2	R3	R4	Mean	St. Dev.	Increase from control		(A) Photosynthetic Rate (µmol m-2 s-1)													Treatments
NPs	CK		0.00143132	0.000795435	7.3966e-05	0.000952494	0.000813303	0.000562214			NPs 0	NPs 75	NPs 150	NPs 300										NPs	CK		1.84902	1.60083	1.64052	4.03985	2.28256	1.17658			NPs 0	NPs 75	NPs 150	NPs 300										NPs	CK
	75 mg		0.00488313	0.0038184	0.00501025	0.0019235	0.00390882	0.00142736	380.61	NPs	0.000813303	0.00390882	0.00204743	0.00121883											75 mg		4.27927	3.99793	4.39978	3.48195	4.03973	0.408202	76.9827	NPs	2.28256	4.03973	3.51745	3.13709											75 mg
	150 mg		0.00191482	0.00234712	0.00153	0.00239777	0.00204743	0.000407377	151.742																150 mg		6.58128	3.04982	2.4006	2.03808	3.51745	2.085	54.1012																150 mg
	300 mg		0.000993969	0.000962865	0.00138094	0.00153757	0.00121883	0.000285162	49.8623																300 mg		1.70499	3.49889	6.11908	1.2254	3.13709	2.21575	37.4375																300 mg

## Sheet: Antioxidant Enzyme activites 
Catalase (Unit g-1)																								Peroxidase (Unit g-1)																								Superoxide dismutase (Unit g-1)
Treatments			R1	R2	R3	Mean	St. Dev.	Increase from control			Catalase (Unit g-1)													Treatments			R1	R2	R3	Mean	St. Dev.	Increase from control			Peroxidase (Unit g-1)													Treatments
NPs	CK		6.64	5.64	6.31	6.19667	0.509542				NPs 0	NPs 75	NPs 150	NPs 300										NPs	CK		4.96	3.89	5.04	4.63	0.642106				NPs 0	NPs 75	NPs 150	NPs 300										NPs-1	CK
	75 mg		8.92	9.21	10.14	9.42333	0.637364	52.071		NPs	6.19667	9.42333	8.69	7.60667											75 mg		7.85	9.16	8.84	8.61667	0.682959	86.1051		NPs-1	4.63	8.61667	7.50667	6.59667											75 mg
	150 mg		8.92	9.04	8.11	8.69	0.505866	40.2367																	150 mg		6.84	8.04	7.64	7.50667	0.61101	62.131																	150 mg
	300 mg		7.21	8.09	7.52	7.60667	0.446356	22.7542																	300 mg		6.91	7.04	5.84	6.59667	0.658508	42.4766																	300 mg
				8

## Sheet: oxidant
MDA (µmol/g)
Treatments		R1	R2	R3	Mean	St. Dev.	Increase from control
CK		2.75	2.68	2.43	2.62	0.168226					MDA (µmol/g)
75 mg		1.41	1.64	1.35	1.46667	0.15308	-44.0204			NPs 0	2.62
150 mg		1.84	1.71	1.64	1.73	0.101489	-33.9695			NPs 75	1.46667
300 mg		2.04	1.92	2.14	2.03333	0.110151	-22.3919			NPs 150	1.73
										NPs 300	2.03333
H2O2 (µmol/g)
Treatments		R1	R2	R3	Mean	St. Dev.	Increase from control
CK		106.2	99.2	110.41	105.27	5.66257					H2O2 (µmol/g)
75 mg		67.84	64.51	75.45	69.2667	5.6078	-34.2009			NPs 0	105.27
150 mg		73.1	78.94	81.45	77.83	4.28424	-26.0663			NPs 75	69.2667
300 mg		86.54	79.64	91.54	85.9067	5.97523	-18.394			NPs 150	77.83
										NPs 300	85.9067
Electrolyte leakage (%)
Treatments		R1	R2	R3	Mean	St. Dev.	Increase from control
CK		111.83	108.54	94.81	105.06	9.0279					Electrolyte leakage (%)
75 mg		54.21	58.94	64.81	59.32	5.31021	-43.537			NPs 0	105.06
150 mg		72.73	74.99	63.01	70.2433	6.36535	-33.1398			NPs 75	59.32
300 mg		88.19	79.84	74.54	80.8567	6.88156	-23.0376			NPs 150	70.2433
										NPs 300	80.8567

## Sheet: Non Antioxidant
Proline (umol/g FW)
Treatments		R1	R2	R3	Mean	St. Dev.	Increase from control
CK		8.051	7.951	7.852	7.95133	0.0995004					Proline (umol/g FW)
75 mg		9.1	8.94	9.04	9.02667	0.080829	13.5239			NPs 0	7.95133
150 mg		8.845	8.61	8.745	8.73333	0.117934	9.83483			NPs 75	9.02667
300 mg		8.348	8.348	8.547	8.41433	0.114893	5.82292			NPs 150	8.73333
										NPs 300	8.41433
Flavionids mg QE/Gram DW
Treatments		R1	R2	R3	Mean	St. Dev.	Increase from control
CK		8.108	8.022	7.302	7.81067	0.442612					Flavionids mg QE/Gram DW
75 mg		12.168	11.674	10.165	11.3357	1.04348	45.1306			NPs 0	7.81067
150 mg		8.777	9.349	10.41	9.512	0.828613	21.7822			NPs 75	11.3357
300 mg		9.152	7.678	7.858	8.22933	0.804105	5.36019			NPs 150	9.512
										NPs 300	8.22933
Total Phenol mg GAE/g DW
Treatments		R1	R2	R3	Mean	St. Dev.	Increase from control
CK		18.94	19.498	17.54	18.6593	1.00872					Total Phenol mg GAE/g DW
75 mg		25.098	27.84	28.54	27.1593	1.81915	45.5536			NPs 0	18.6593
150 mg		22.54	26.54	27.14	25.4067	2.50067	36.1606			NPs 75	27.1593
300 mg		22.51	20.773	23.628	22.3037	1.43864	19.5309			NPs 150	25.4067
										NPs 300	22.3037

## Sheet: Nutrient 
Ca in Leaves (mg/kg)																												Ca in Shoots (mg/kg)
Treatments		R1	R2	R3	Mean	St. Dev.	Increase from control																					Treatments		R1	R2	R3	Mean	St. Dev.	Increase from control
CK		2833.97	2678.08	2454.54	2655.53	190.717					Ca in Leaves (mg/kg)																	CK		1482.61	1263.3	1354.81	1366.91	110.154					Ca in Shoots (mg/kg)
75 mg		4527.7	3947.29	4364.51	4279.83	299.327	61.1668			NPs 0	2655.53																	75 mg		2701.58	2369.09	2534.81	2535.16	166.245	85.4669			NPs 0	1366.91
150 mg		4081.89	3544.23	3845.61	3823.91	269.486	43.998			NPs 75	4279.83																	150 mg		2127.48	1996.67	2261.54	2128.56	132.438	55.7212			NPs 75	2535.16
300 mg		3455.53	3073.05	3251.84	3260.14	191.375	22.768			NPs 150	3823.91																	300 mg		1599.4	1809.12	1734.81	1714.44	106.333	25.425			NPs 150	2128.56
										NPs 300	3260.14																											NPs 300	1714.44
Cu in Leaves (mg/kg)																												Cu in Shoots (mg/kg)
Treatments		R1	R2	R3	Mean	St. Dev.	Increase from control																					Treatments		R1	R2	R3	Mean	St. Dev.	Increase from control
CK		4.14	3.45	3.64	3.74333	0.356417					Cu in Leaves (mg/kg)																	CK		2.41	1.94	2.34	2.23	0.253574					Cu in Shoots (mg/kg)
75 mg		5.97	5.42	6.24	5.87667	0.417892	56.9902			NPs 0	3.74333																	75 mg		3.67	3.79	4.015	3.825	0.175143	71.5247			NPs 0	2.23
150 mg		5.42	5.15	4.78	5.11667	0.321299	36.6874			NPs 75	5.87667																	150 mg		3.16	3.53	3.34	3.34333	0.185023	49.9253			NPs 75	3.825
300 mg		4.1	4.62	4.42	4.38	0.262298	17.008			NPs 150	5.11667																	300 mg		2.94	2.84	2.54	2.77333	0.208167	24.3647			NPs 150	3.34333
										NPs 300	4.38																											NPs 300	2.77333
Mg in Leaves (mg/kg)																												Mg in Shoots (mg/kg)
Treatments		R1	R2	R3	Mean	St. Dev.	Increase from control																					Treatments		R1	R2	R3	Mean	St. Dev.	Increase from control
CK		294.54	345.81	314.54	318.297	25.8406					Mg in Leaves (mg/kg)																	CK		221.54	235.54	264.21	240.43	21.7512					Mg in Shoots (mg/kg)
75 mg		603.06	500.88	584.61	562.85	54.4547	76.8319			NPs 0	318.297																	75 mg		441.84	464.77	384.51	430.373	41.3404	79.0015			NPs 0	240.43
150 mg		516.38	425.59	494.51	478.827	47.3833	50.4341			NPs 75	562.85																	150 mg		341.84	384.51	345.21	357.187	23.7226	48.5616			NPs 75	430.373
300 mg		390.71	415.07	354.81	386.863	30.3136	21.5417			NPs 150	478.827																	300 mg		321.45	274.51	284.51	293.49	24.7249	22.0688			NPs 150	357.187
										NPs 300	386.863																											NPs 300	293.49
Zn in Leaves (mg/kg)																												Zn in Shoots (mg/kg)
Treatments		R1	R2	R3	Mean	St. Dev.	Increase from control																					Treatments		R1	R2	R3	Mean	St. Dev.	Increase from control
CK		1.84	2.34	2.04	2.07333	0.251661					Zn in Leaves (mg/kg)																	CK		1.94	1.64	1.54	1.70667	0.208167					Zn in Shoots (mg/kg)
75 mg		4.01	3.84	3.41	3.75333	0.309246	81.0289			NPs 0	2.07333																	75 mg		2.89	3.28	3.34	3.17	0.244336	85.7422			NPs 0	1.70667
150 mg		3.25	3.09	3.54	3.29333	0.228108	58.8424			NPs 75	3.75333																	150 mg		2.78	3.04	2.54	2.78667	0.250067	63.2812			NPs 75	3.17
300 mg		2.24	2.64	2.84	2.57333	0.305505	24.1158			NPs 150	3.29333																	300 mg		2.21	2.14	1.74	2.03	0.253574	18.9453			NPs 150	2.78667
										NPs 300	2.57333																											NPs 300	2.03
Fe in Leaves (mg/kg)																												Fe in Shoots (mg/kg)
Treatments		R1	R2	R3	Mean	St. Dev.	Increase from control																					Treatments		R1	R2	R3	Mean	St. Dev.	Increase from control
CK		3.61	1.63	14.54	6.59333	6.95286					Fe in Leaves (mg/kg)																	CK		7.58	9.84	8.49	8.63667	1.13712					Fe in Shoots (mg/kg)
75 mg		15.64	4.17	42.81	20.8733	19.8445	216.582			NPs 0	6.59333																	75 mg		17.24	16.84	20.48	18.1867	1.99613	110.575			NPs 0	8.63667
150 mg		3.54	9.84	29.28	14.22	13.4173	115.672			NPs 75	20.8733																	150 mg		12.54	14.84	13.84	13.74	1.15326	59.0892			NPs 75	18.1867
300 mg		6.54	13.54	14.84	11.64	4.4643	76.542			NPs 150	14.22																	300 mg		9.54	10.254	11.94	10.578	1.23237	22.4778			NPs 150	13.74
										NPs 300	11.64																											NPs 300	10.578
Mn in Leaves (mg/kg)																												Mn in Shoots (mg/kg)
Treatments		R1	R2	R3	Mean	St. Dev.	Increase from control																					Treatments		R1	R2	R3	Mean	St. Dev.	Increase from control
CK		3.16	4.02	3.54	3.57333	0.430968					Mn in Leaves (mg/kg)																	CK		2.27	2.57	2.24	2.36	0.182483					Mn in Shoots (mg/kg)
75 mg		5.74	6.07	6.24	6.01667	0.254231	68.3769			NPs 0	3.57333																	75 mg		3.94	4.21	4.35	4.16667	0.208407	76.5537			NPs 0	2.36
150 mg		5.04	5.31	4.86	5.07	0.226495	41.8843			NPs 75	6.01667																	150 mg		3.18	3.76	3.58	3.50667	0.296873	48.5876			NPs 75	4.16667
300 mg		4.48	3.94	4.51	4.31	0.32078	20.6157			NPs 150	5.07																	300 mg		2.54	3.04	2.84	2.80667	0.251661	18.9266			NPs 150	3.50667
										NPs 300	4.31																											NPs 300	2.80667
K in Leaves (mg/kg)																												K in Roots (mg/kg)
Treatments		R1	R2	R3	Mean	St. Dev.	Increase from control																					Treatments		R1	R2	R3	Mean	St. Dev.	Increase from control
CK		1441.48	1212.73	1341.54	1331.92	114.678					K in Leaves (mg/kg)																	CK		928.64	784.51	634.51	782.553	147.075					K in Roots (mg/kg)
75 mg		2507.59	2346.53	2534.81	2462.98	101.76	84.9197			NPs 0	1331.92																	75 mg		1468.45	1358.16	1242.54	1356.38	112.965	73.3279			NPs 0	782.553
150 mg		2066.89	1931.73	2184.54	2061.05	126.506	54.7434			NPs 75	2462.98																	150 mg		1297.07	1088.64	1124.51	1170.07	111.435	49.5199			NPs 75	1356.38
300 mg		1753.45	1623.52	1864.71	1747.23	120.715	31.1814			NPs 150	2061.05																	300 mg		977.71	1124.92	1024.54	1042.39	75.2108	33.2037			NPs 150	1170.07
										NPs 300	1747.23																											NPs 300	1042.39

## Sheet: Metal
As in Root (mg/kg)
Treatments		R1	R2	R3	Mean	St. Dev.	Increase from control
CK		148	139.84	150.61	146.15	5.61828					As in Root (mg/kg)
75 mg		121.54	115.45	109.84	115.61	5.85164	-20.8963			NPs 0	146.15
150 mg		123.45	129.54	134.45	129.147	5.51054	-11.6342			NPs 75	115.61
300 mg		131.45	138.51	139.51	136.49	4.39331	-6.60965			NPs 150	129.147
										NPs 300	136.49
As in Shoot (mg/kg)
Treatments		R1	R2	R3	Mean	St. Dev.	Increase from control
CK		58.84	56.84	61.54	59.0733	2.35867					As in Shoot (mg/kg)
75 mg		32	29.64	35.54	32.3933	2.9696	-45.1642			NPs 0	59.0733
150 mg		41.51	43.51	38.54	41.1867	2.50073	-30.2787			NPs 75	32.3933
300 mg		47.84	45.21	49.91	47.6533	2.35555	-19.3319			NPs 150	41.1867
										NPs 300	47.6533

## Sheet: Cerium contents
Ce in Leaves (mg/kg)
Treatments		R1	R2	R3	Mean	St. Dev.	Increase from control
CK		2.79	2.53	2.71	2.67667	0.133167					Ce in Leaves (mg/kg)
75 mg		48.97	53.85	46.84	49.8867	3.59378	1763.76			NPs 0	2.67667
150 mg		79.36	86.58	74.54	80.16	6.05974	2894.77			NPs 75	49.8867
300 mg		144.54	151.86	149.54	148.647	3.74087	5453.42			NPs 150	80.16
										NPs 300	148.647
Ce in Shoots (mg/kg)
Treatments		R1	R2	R3	Mean	St. Dev.	Increase from control
CK		3.04	2.55	1.98	2.52333	0.530503					Ce in Shoots (mg/kg)
75 mg		15.85	14.92	17.84	16.2033	1.49172	542.14			NPs 0	2.52333
150 mg		55.56	49.08	52.84	52.4933	3.25388	1980.32			NPs 75	16.2033
300 mg		79.34	87.36	78.94	81.88	4.75003	3144.91			NPs 150	52.4933
										NPs 300	81.88
Ce in Roots (mg/kg)
Treatments		R1	R2	R3	Mean	St. Dev.	Increase from control
CK		3.82	4.03	3.34	3.73	0.353695					Ce in Roots (mg/kg)
75 mg		5.64	5.82	6.41	5.95667	0.402782				NPs 0	3.73
150 mg		7.84	8.04	7.24	7.70667	0.416333				NPs 75	5.95667
300 mg		9.83	9.84	10.41	10.0267	0.332014				NPs 150	7.70667
										NPs 300	10.0267

## Sheet: Soil Analysis 
pH											EC												Soil Organic matter (%)											Nitrogen (mg/kg)											Magnesium (mg/kg)
Initial Soil Analysis			R1	R2	R3	Mean					Initial Soil Analysis			R1	R2	R3	Mean EC (μS/cm)	(μS/cm) to mS/m					Initial Soil Analysis			R1	R2	R3	Mean					Initial Soil Analysis			R1	R2	R3	Mean					Initial Soil Analysis			R1	R2
			7.54	8.32	6.94	7.6								2032	2082	2020	2044.67	2.045								0.994	1.058	1.084	1.04533								0.49	1.45	0.58	0.84								201.04	158.01
[truncated: 17 more columns]
